# Supplementary material for: Supramolecular architecture and photophysical and biological properties of ruthenium(ii) polypyridyl complexes
Source: Royal Society of Chemistry journal article supplement (doi:10.1039/c4nj02394c), 2015-01-01
Supplement: c4nj02394c1.pdf [file c4nj02394c1.pdf]

## Supporting Information

### Supramolecular Architecture, Photophysical and Biological Properties of Ruthenium(II) Polypyridyl Complexes

Satish S. Bhat,<sup>a\*</sup> Vidyanand K. Revankar,<sup>a\*</sup> Ayesha Khan<sup>b</sup>, Raymond J. Butcher<sup>c</sup> and Krishnachary Thatipamula<sup>d</sup>

**Table S1.** Crystal data and structure refinement parameters for complexes **2**.

|                                            |                                                                                                                |
|--------------------------------------------|----------------------------------------------------------------------------------------------------------------|
| Chemical formula                           | C <sub>36</sub> H <sub>22</sub> N <sub>8</sub> RuS·2(Cl)·10(H <sub>2</sub> O)                                  |
| Formula weight (g·mol <sup>-1</sup> )      | 950.81                                                                                                         |
| Temperature (K)                            | 100                                                                                                            |
| Wavelength (Å)                             | 0.71073                                                                                                        |
| Crystal system                             | Triclinic                                                                                                      |
| Space group                                | P-1                                                                                                            |
| Unit cell dimensions                       | a = 11.0785(12) Å   α = 76.422(2)°<br>b = 11.9068(13) Å   β = 75.205(2)°<br>c = 16.6733(18) Å   γ = 79.014(2)° |
| Volume (Å <sup>3</sup> )                   | 2047.0(4)                                                                                                      |
| Z                                          | 2                                                                                                              |
| F(000)                                     | 976                                                                                                            |
| Density (Mg/m <sup>3</sup> )               | 1.543                                                                                                          |
| Absorption coefficient (mm <sup>-1</sup> ) | 0.630                                                                                                          |
| Crystal size (mm)                          | 0.16×0.12×0.08                                                                                                 |
| θ range (°)                                | 1.29 to 25.00                                                                                                  |
| Range of h, k, l                           | −13,13/ −14,14/ −19,19                                                                                         |
| Refinement on                              | F <sup>2</sup>                                                                                                 |
| Reflections collected                      | 19774                                                                                                          |
| Unique reflections [R <sub>int</sub> ]     | 7189 [0.0670]                                                                                                  |
| Goodness-of-fit on F <sup>2</sup>          | 1.11                                                                                                           |
| R <sub>I</sub> [I>2σ(I)]                   | 0.0786                                                                                                         |
| wR <sub>2</sub> (all data)                 | 0.1863                                                                                                         |

$$w = 1/[\sigma^2(F_o^2) + (AP)^2 + BP]; \text{ where } P = [2F_c^2 + \text{Max}(F_o^2, 0)]/3$$

**Table S2.** Selected bond lengths [Å] and angles [°] for complex **2**.

| Bond lengths |           |              |           |
|--------------|-----------|--------------|-----------|
| Ru-N(1)      | 2.060 (5) | Ru-N(4)      | 2.062 (5) |
| Ru-N(2)      | 2.066 (5) | Ru-N(5)      | 2.053 (5) |
| Ru-N(3)      | 2.054 (5) | Ru-N(6)      | 2.071 (5) |
| Bond angles  |           |              |           |
| N(1)-Ru-N(2) | 79.80 (2) | N(3)-Ru-N(2) | 89.70(2)  |
| N(3)-Ru-N(1) | 93.80 (2) | N(3)-Ru-N(4) | 79.80(2)  |
| N(4)-Ru-N(1) | 171.9 (2) | N(5)-Ru-N(3) | 95.42(2)  |
| N(5)-Ru-N(1) | 93.47 (2) | N(3)-Ru-N(6) | 172.9(2)  |
| N(1)-Ru-N(6) | 91.81 (2) | N(5)-Ru-N(4) | 92.20(2)  |
| N(4)-Ru-N(2) | 95.10 (2) | N(4)-Ru-N(6) | 94.90(2)  |
| N(5)-Ru-N(2) | 171.8 (2) | N(5)-Ru-N(6) | 79.95(2)  |
| N(2)-Ru-N(6) | 95.52 (2) |              |           |

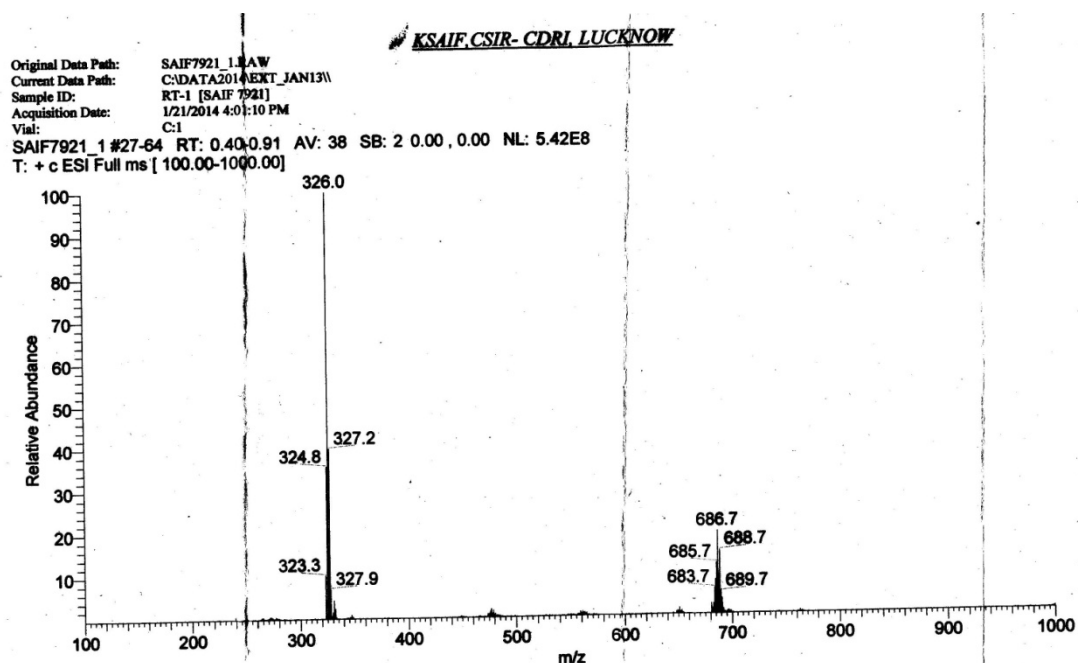

**Figure S1.** ESI-MS (Positive mode) Spectrum of complex **1**.

**KSAIF, CSIR- CDRI, LUCKNOW**

Original Data Path: SAIF7921\_02.RAW  
 Current Data Path: C:\DATA2014\EXT\_JAN13\  
 Sample ID: RT-2 [SAIF 7921]  
 Acquisition Date: 1/21/2014 4:04:57 PM  
 Vial: C:2  
 SAIF7921\_02 #29-66 RT: 0.39-0.91 AV: 38 SB: 2 0.00, 0.00 NL: 8.66E8  
 T: + c ESI Full ms [ 100.00-1000.00]

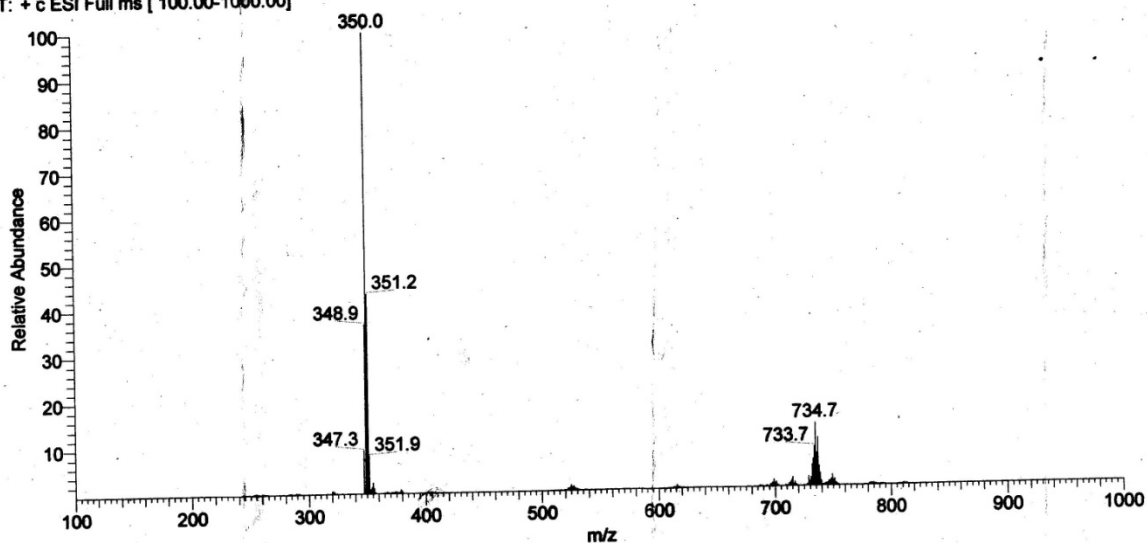

**Figure S2.** ESI-MS (Positive mode) Spectrum of complex 2.

**KSAIF, CSIR- CDRI, LUCKNOW**

Original Data Path: SAIF7921\_03.RAW  
 Current Data Path: C:\DATA2014\EXT\_JAN13\  
 Sample ID: RT-3 [SAIF 7921]  
 Acquisition Date: 1/21/2014 4:08:33 PM  
 Vial: C:3  
 SAIF7921\_03 #29-65 RT: 0.40-0.90 AV: 37 SB: 2 0.01, 0.01 NL: 1.00E9  
 T: + c ESI Full ms [ 100.00-1000.00]

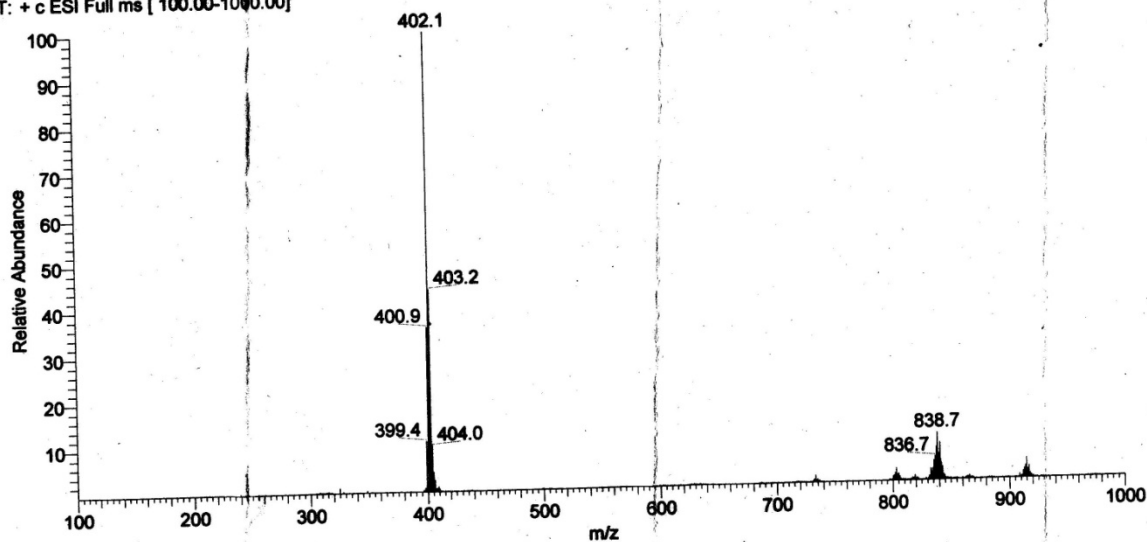

**Figure S3.** ESI-MS (Positive mode) Spectrum of complex 3.

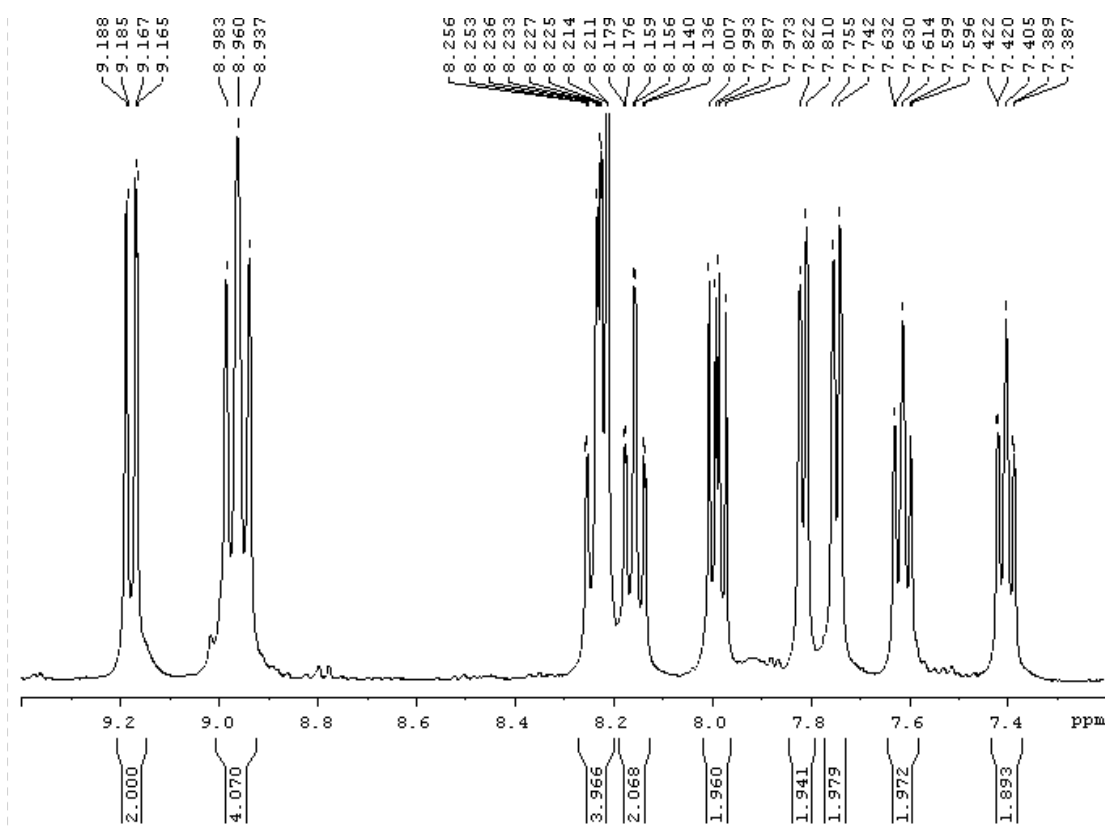

**Figure S4.** <sup>1</sup>H-NMR spectrum of complex 1 in DMSO-d<sub>6</sub> in the range 7.0-9.4 ppm.

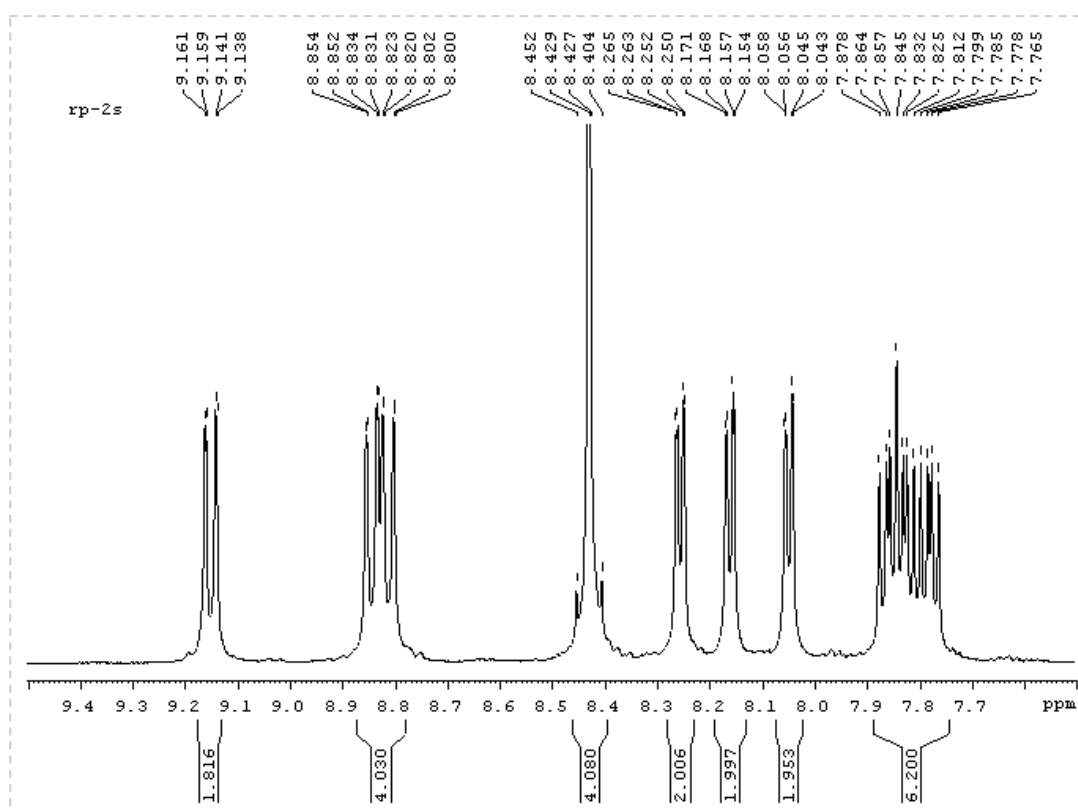

**Figure S5.** <sup>1</sup>H-NMR spectrum of complex 2 in DMSO-d<sub>6</sub> in the range 7.5-9.5 ppm.

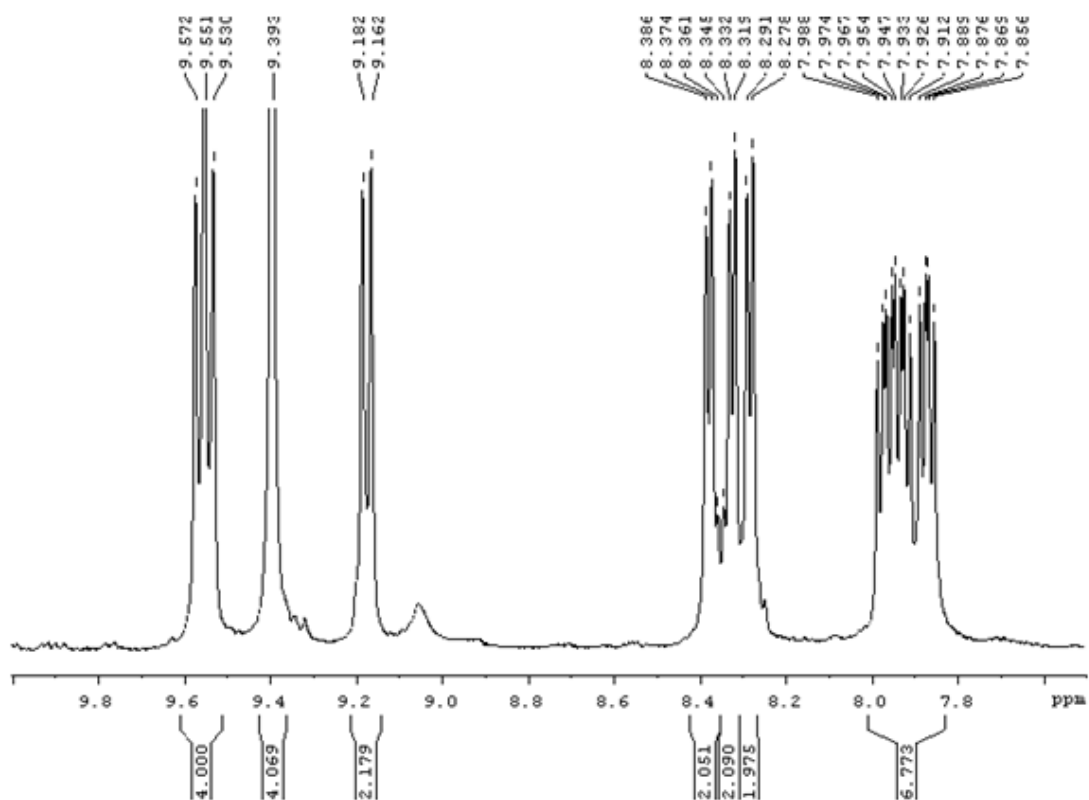

**Figure S6.**  $^1\text{H}$ -NMR spectrum of complex **3** in  $\text{DMSO-d}_6$  in the range 7.5-9.9 ppm.

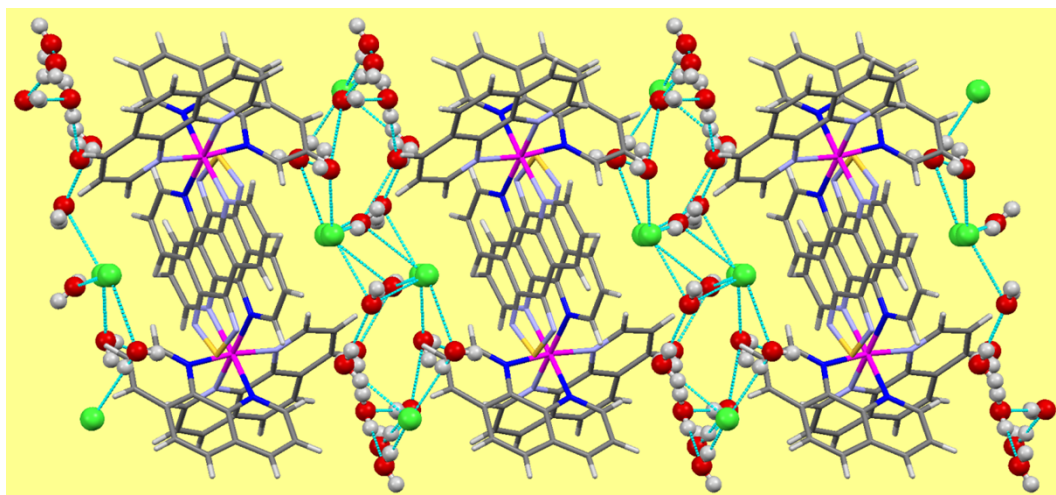

**Figure S7.** Packing diagram showing water-chloride cluster formed by hydrogen bonding as seen along 'a' axis.

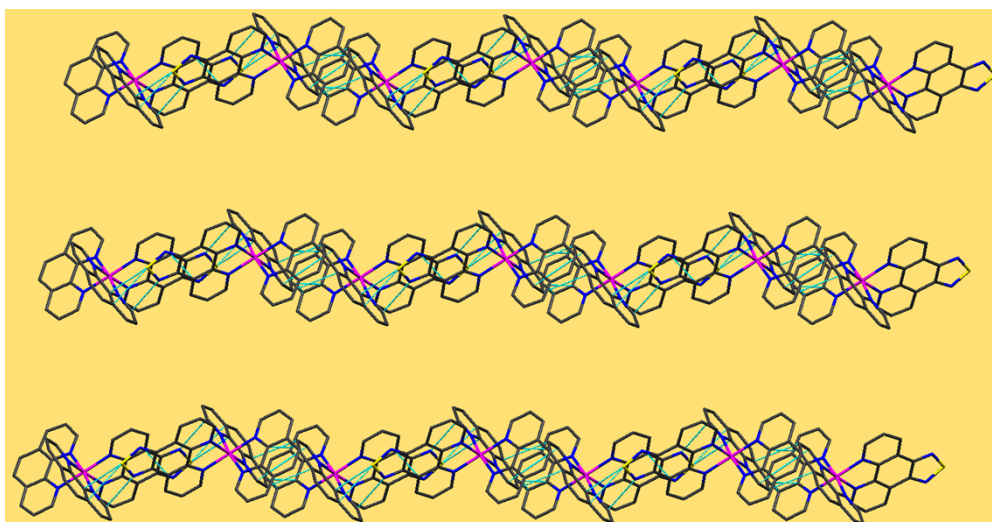

**Figure S8.** Crystal packing diagram chloride and water molecules have been omitted to show the cationic building block forming the channels.

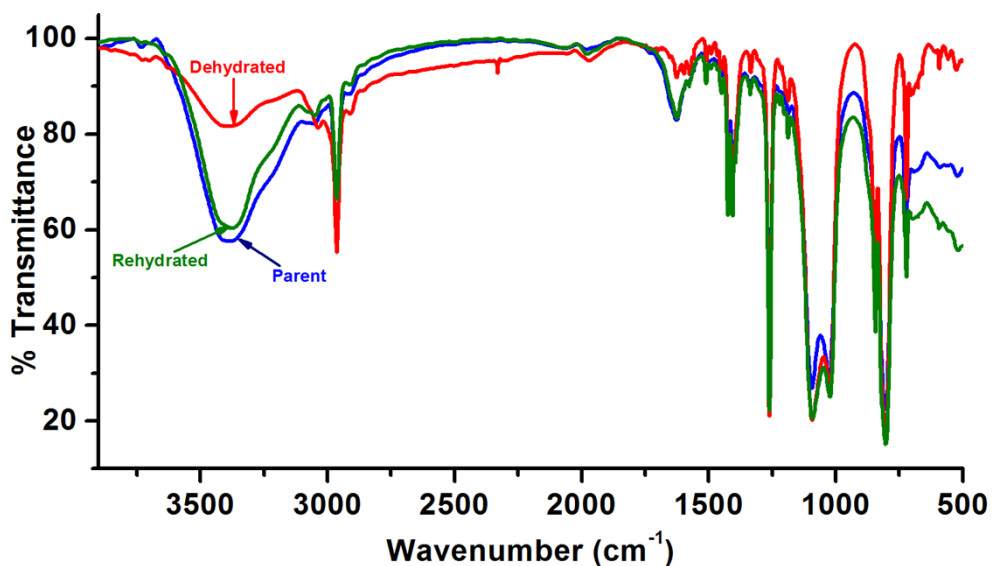

**Figure S9.** Comparative FT-IR spectra of parent, dehydrated and rehydrated sample of **2**

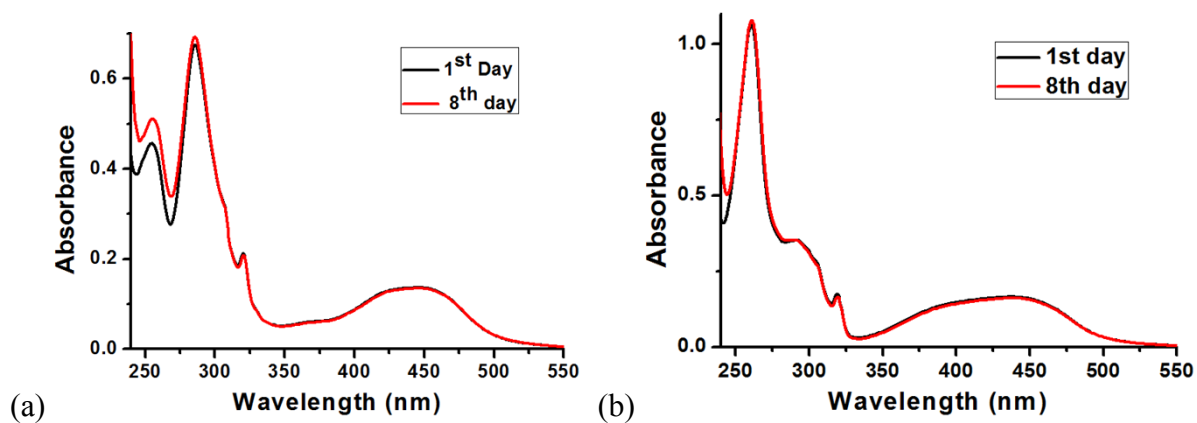

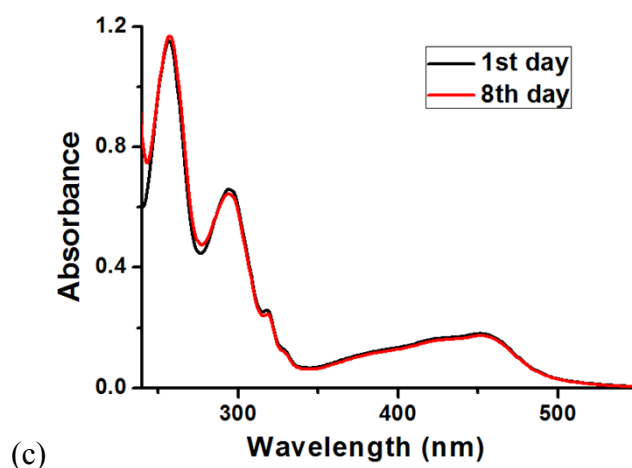

**Figure S10.** Comparative absorption spectra of complexes (10  $\mu\text{M}$ ) in water immediately after dissolving and after 8<sup>th</sup> day of dissolving.

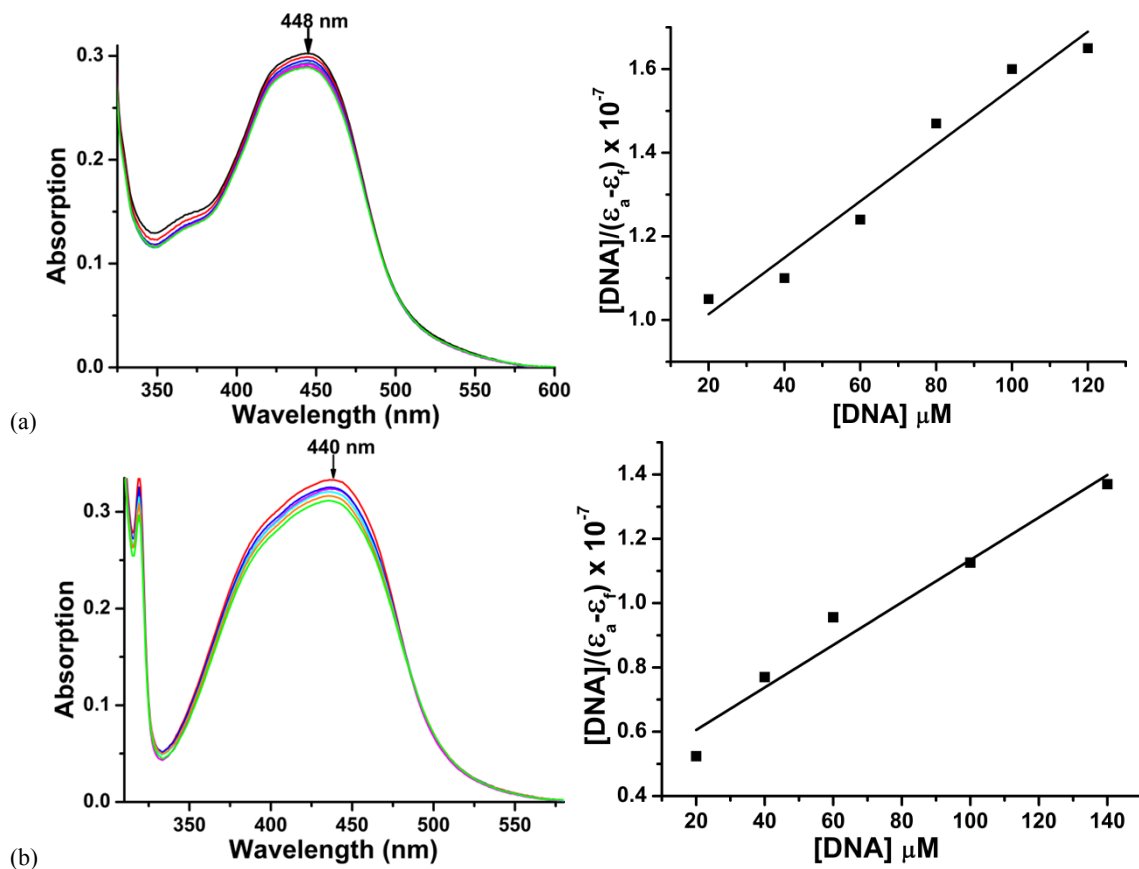

**Figure S11.** Changes in the electronic absorption spectra of (a) complex 1 (20  $\mu\text{M}$ ) (left), fitting of the absorbance data used to obtain the binding constant (right), (b) complex 2 (20  $\mu\text{M}$ ) (left), fitting of the absorbance data used to obtain the binding constant (right), with increasing concentrations (0–140  $\mu\text{M}$ ) of CT-DNA (phosphate buffer, pH 7.2).

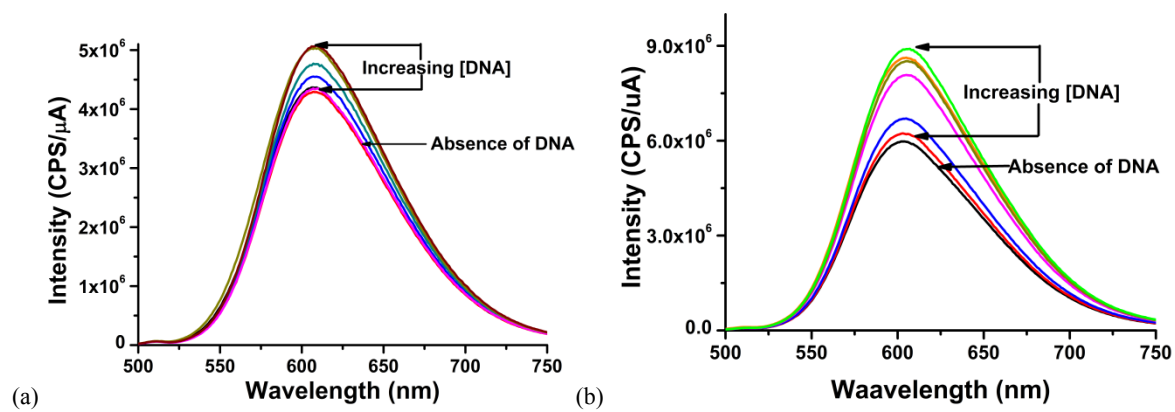

**Figure S12.** Emission spectra of complexes (a) **1**, (b) **2**, 10 μM in phosphate buffer, pH 7.2, at 298 K with increasing [CT-DNA]/[Ru] ratio 0-20; [complex] = 10 μM, [DNA] = 0-200 μM.
